# Supplementary material for: Chitosan-Functionalized-Graphene Oxide (GO@CS) Beads as an Effective Adsorbent to Remove Cationic Dye from Wastewater
Source: MDPI journal article supplement (doi:10.3390/polym14194236), 2022-10-09
Supplement: s1 [file s1]

## Experimental Section

### Kinetic Models

**Table S1.** Kinetic model [42].

| Isotherm                    | Linear form                                           | Plot                                      | Slope and intercept                                                                  |
|-----------------------------|-------------------------------------------------------|-------------------------------------------|--------------------------------------------------------------------------------------|
| 1 <sup>st</sup> order model | $\log(q_e - q_t) = \log q_e + \frac{K_{ads}t}{2.303}$ | Log(q <sub>e</sub> -q <sub>t</sub> ) vs t | Slope = K <sub>ads</sub> /2.303<br>Intercept = log q <sub>e</sub>                    |
| 2 <sup>nd</sup> order model | $\frac{t}{q_t} = \frac{1}{K_2 q_e^2} + \frac{t}{q_e}$ | t/q <sub>t</sub> vs t                     | Slope = 1/q <sub>e</sub><br>Intercept = 1/K <sub>2</sub> q <sub>e</sub> <sup>2</sup> |

**Table S2.** Linear forms of adsorption isotherm models [42,43].

| Isotherm   | Linear Form                                                                       | Plot                                                 | Slope and Intercept                                        |
|------------|-----------------------------------------------------------------------------------|------------------------------------------------------|------------------------------------------------------------|
| Langmuir   | $\frac{C_e}{q_e} = \left(\frac{1}{Q_o b}\right) + \left(\frac{1}{Q_o}\right) C_e$ | C <sub>e</sub> /q <sub>e</sub> versus C <sub>e</sub> | Slope= 1/ Q <sub>o</sub><br>Intercept =1/ Q <sub>o</sub> b |
| Freundlich | $\log q_e = \log K_f + \frac{1}{n} \log C_e$                                      | log q <sub>e</sub> versus log C <sub>e</sub>         | Slope= 1/n<br>Intercept = logK <sub>f</sub>                |
| Temkin     | $q_e = B \ln K_t + B \ln C_e$                                                     | q <sub>e</sub> versus lnC <sub>e</sub>               | Slope= B<br>Intercept = B ln K <sub>T</sub>                |
